# Supplementary material for: Functional integration of hierarchical core–shell architectures via vertically arrayed ultrathin CuSe nanosheets decorated on hollow CuS microcages targeting highly effective sodium-ion storage
Source: Royal Society of Chemistry journal article supplement (doi:10.1039/d1ta09264b), 2021-01-01
Supplement: d1ta09264b1.pdf [file d1ta09264b1.pdf]

## Electronic Supplementary Information

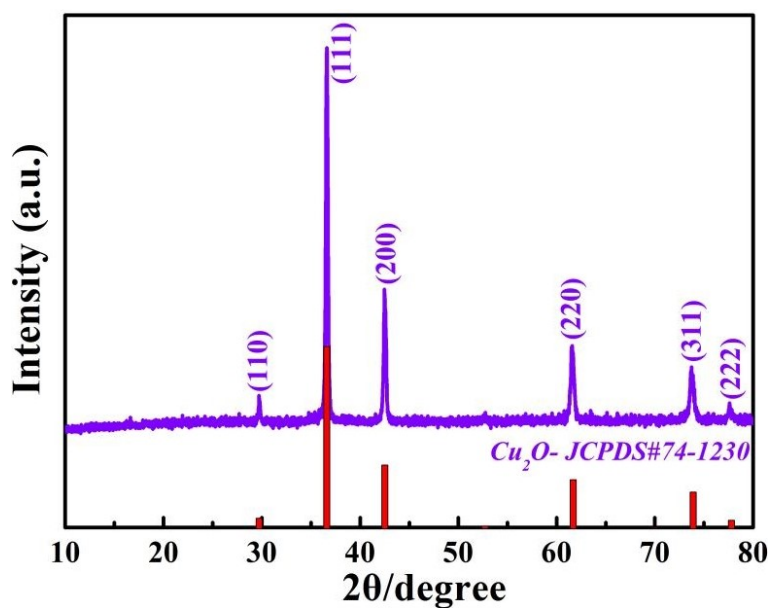

Fig. S1 XRD pattern of the Cu<sub>2</sub>O microcubes.

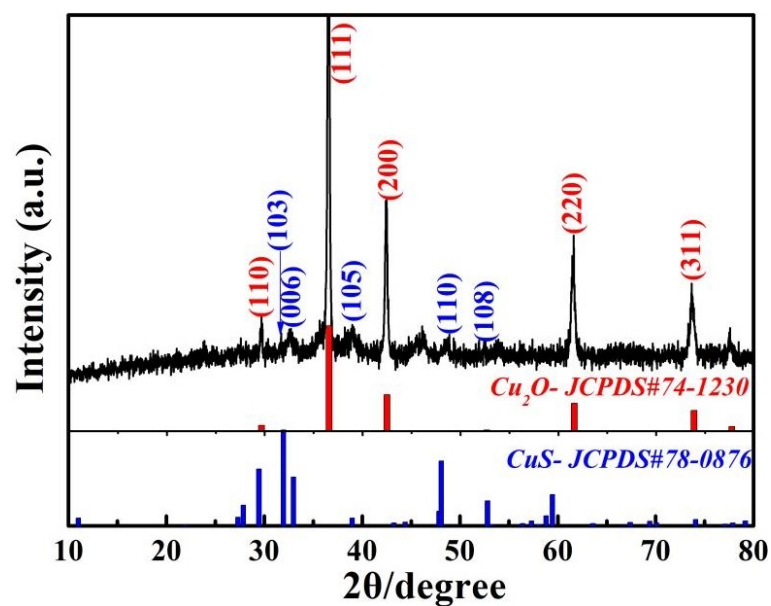

Fig. S2 XRD pattern of the Cu<sub>2</sub>O@CuS microcubes.

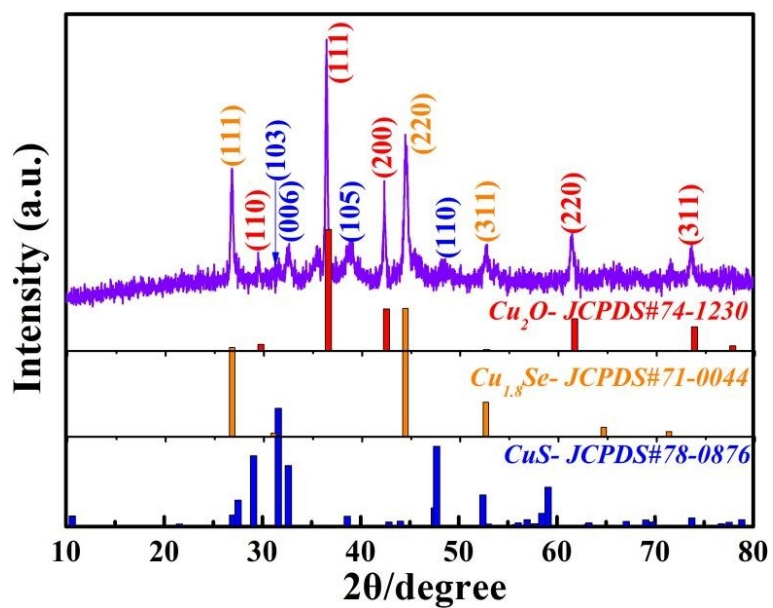

Fig. S3 XRD pattern of the  $\text{Cu}_2\text{O}@CuS@Cu_{1.8}Se$  microcubes.

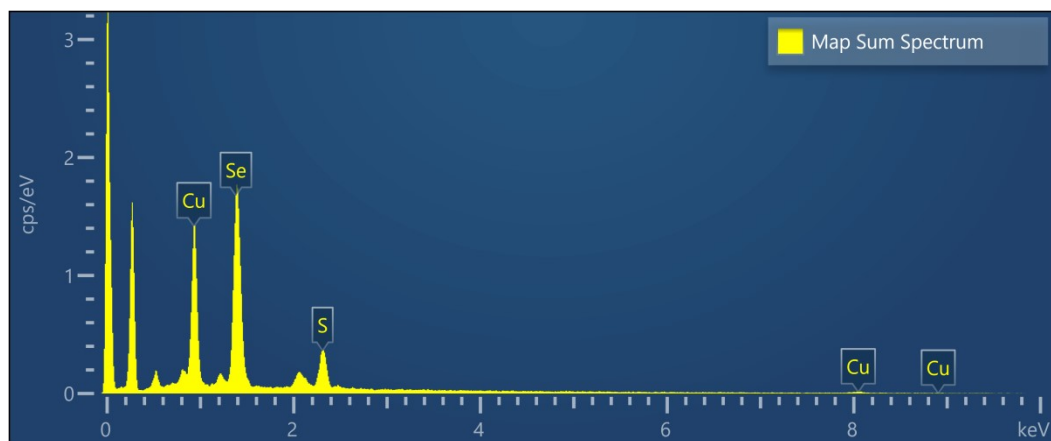

Fig. S4 EDX spectrum of the  $\text{CuS}@CuSe$  microcubes

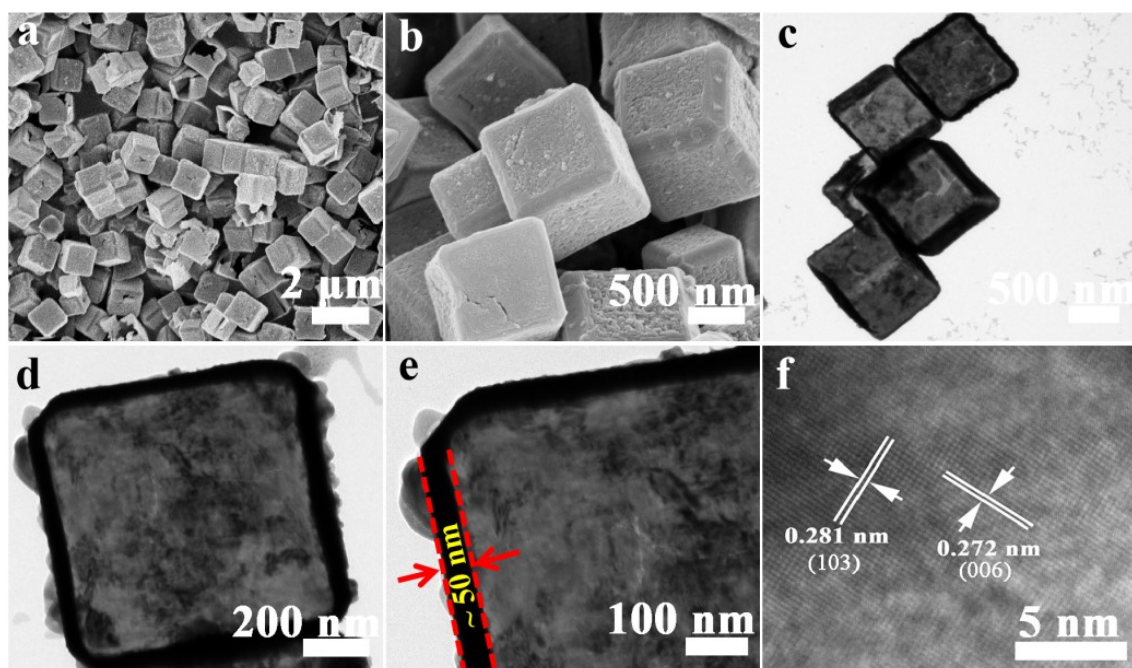

Fig. S5 Structural characterizations of the CuS microcubes: (a, b) SEM images, (c-e) TEM images, (f) HRTEM image.

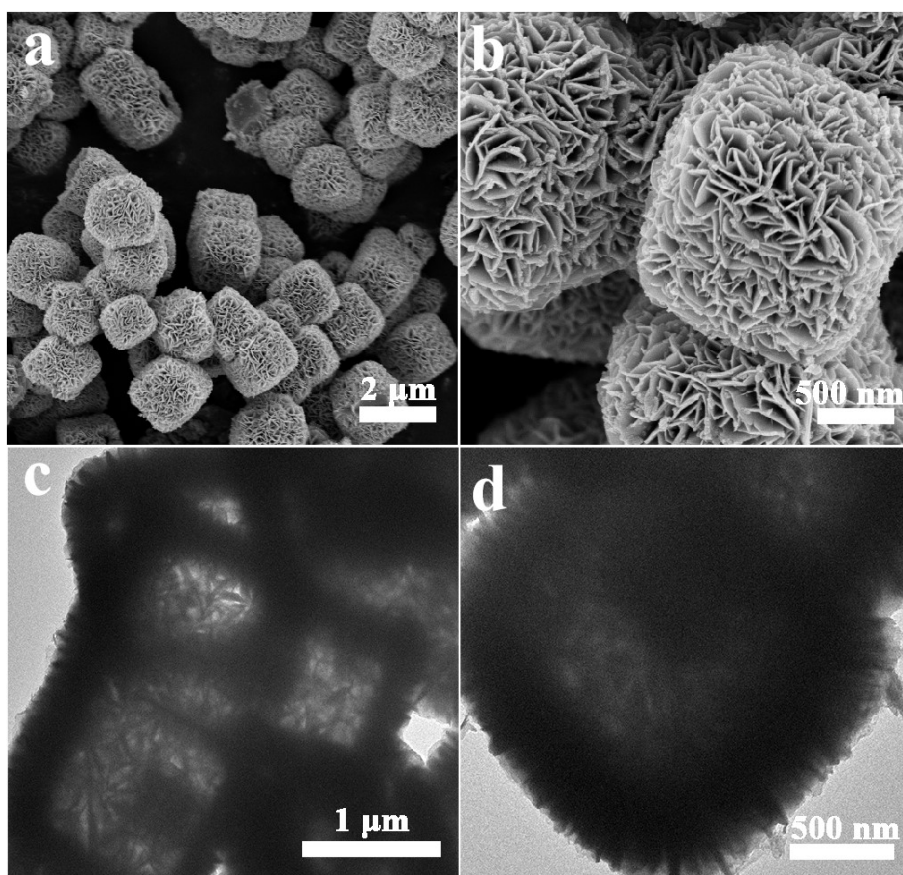

Fig. S6 Structural characterizations of the  $\text{Cu}_2\text{O}@\text{CuSe}$  microcubes: (a, b) SEM images, (c-e) TEM images.

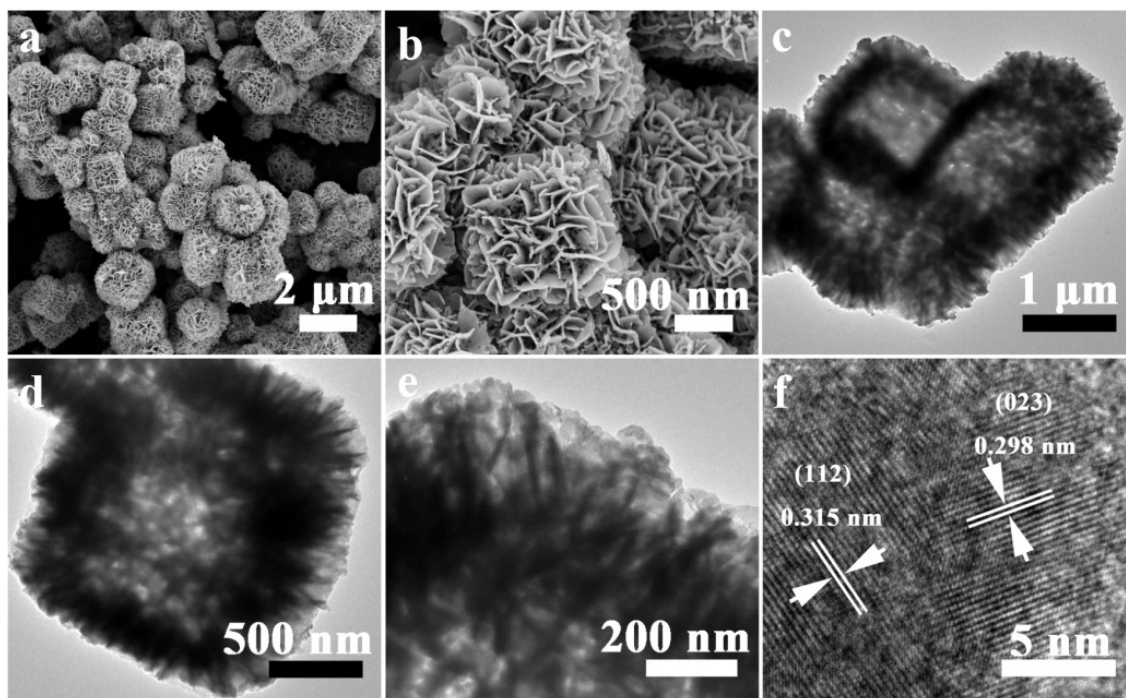

Fig. S7 Structural characterizations of the CuSe microcubes: (a, b) SEM images, (c-e) TEM images, (f) HRTEM image.

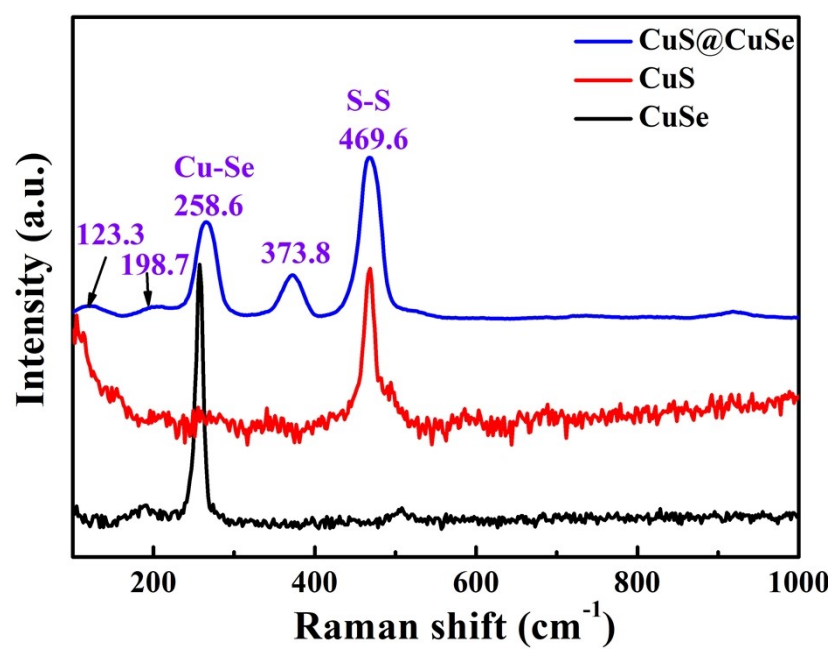

Fig. S8 Raman spectra of the CuS@CuSe, single CuS, and CuSe.



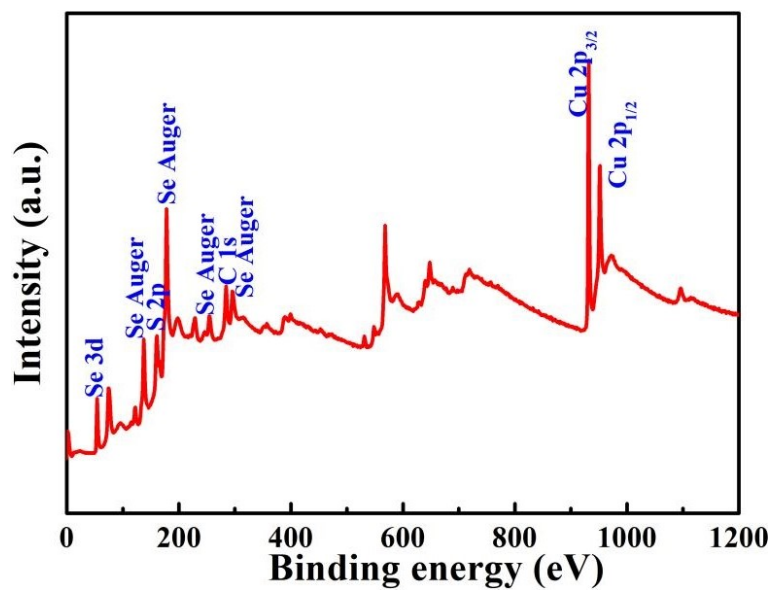

Fig. S9 XPS survey spectrum of the CuS@CuSe microcubes.

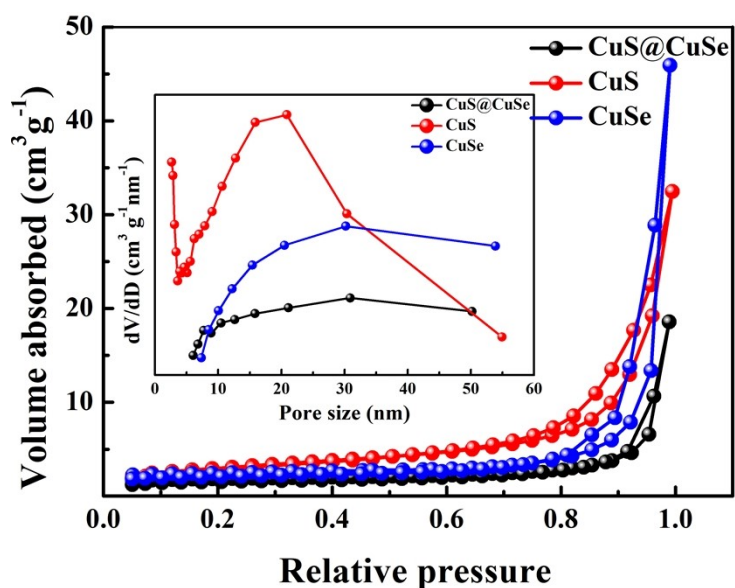

Fig. S10 Nitrogen adsorption–desorption isotherms and pore size distribution of the CuS@CuSe, single CuS, and CuSe.

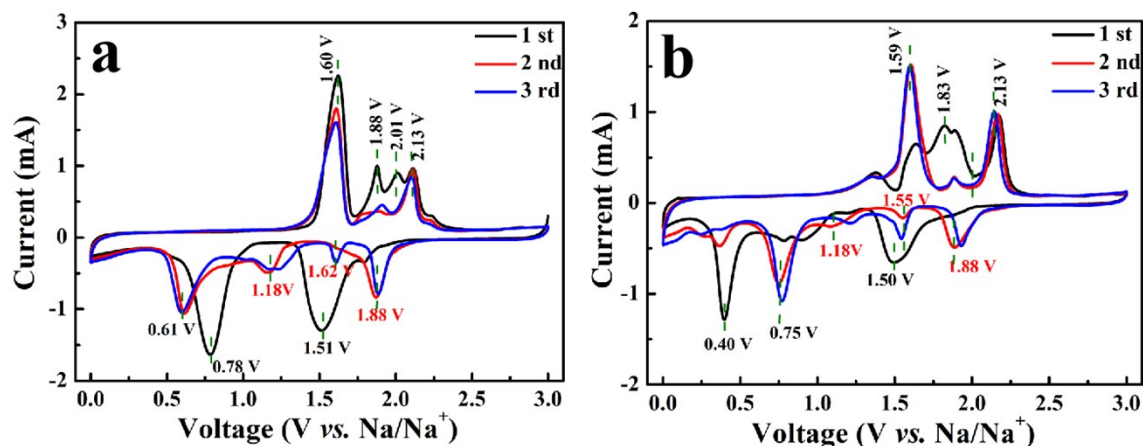

Fig. S11 CV curves of the CuS (a) and CuSe (b) electrodes at  $0.5 \text{ mV s}^{-1}$ .

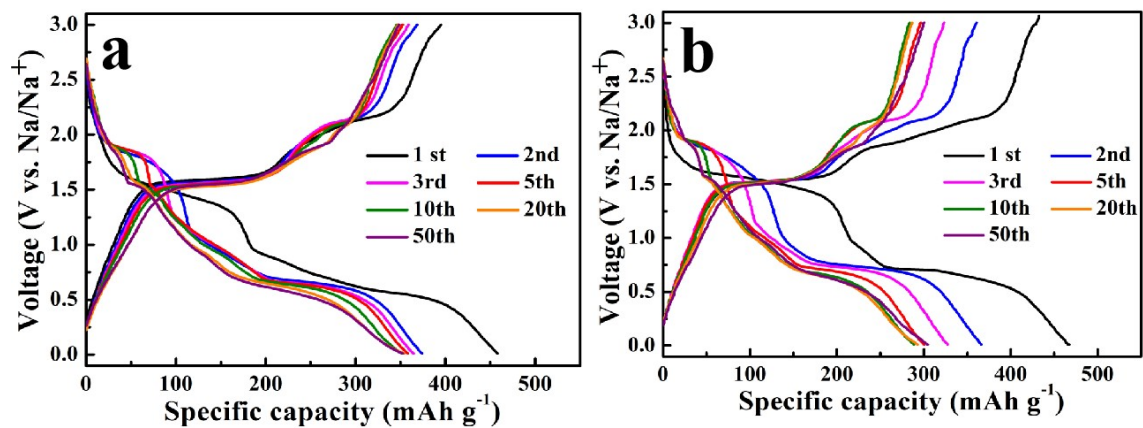

Fig. S12 GDC curves of the CuS (a) and CuSe (b) electrodes at  $2.0 \text{ A g}^{-1}$ .

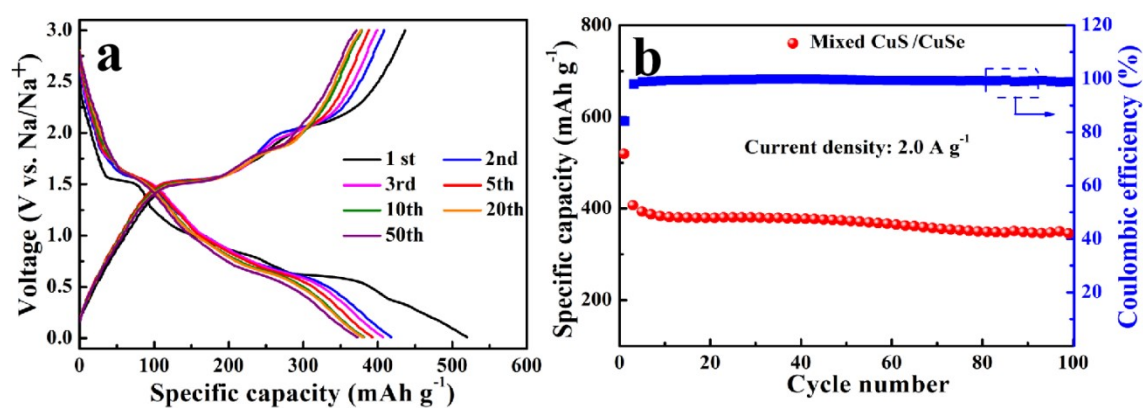

Fig. S13 GDC curves (a) and cycling performance (b) of the mixed CuS/CuSe electrode with a mass ratio of 1:1 at  $2.0 \text{ A g}^{-1}$ .

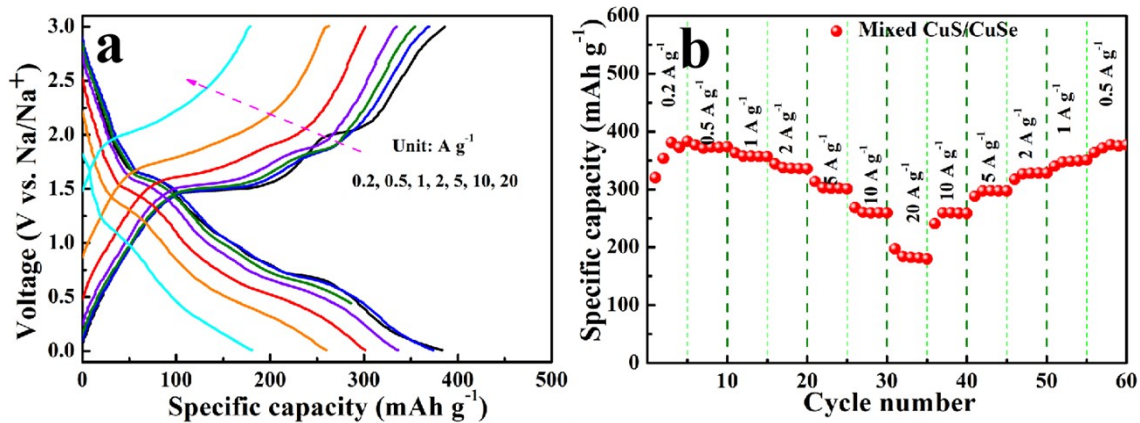

Fig. S14 GDC curves at different rates (a) and rate performance (b) of the mixed CuS/CuSe electrode with a mass ratio of 1:1.

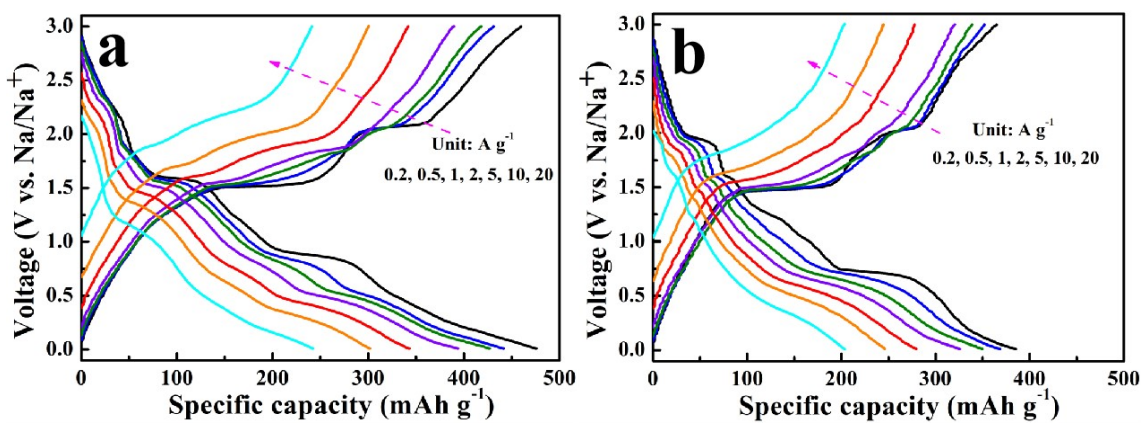

Fig. S15 GDC profiles of single CuS (a) and CuSe (b) electrodes at diverse rates.

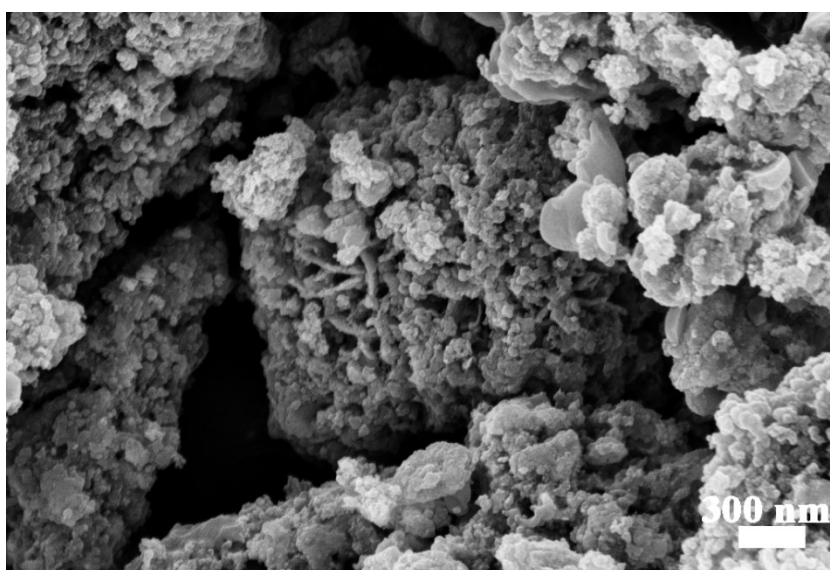

Fig. S16 SEM image of CuS@CuSe electrode after long-term cycle at 2.0 A g<sup>-1</sup>.

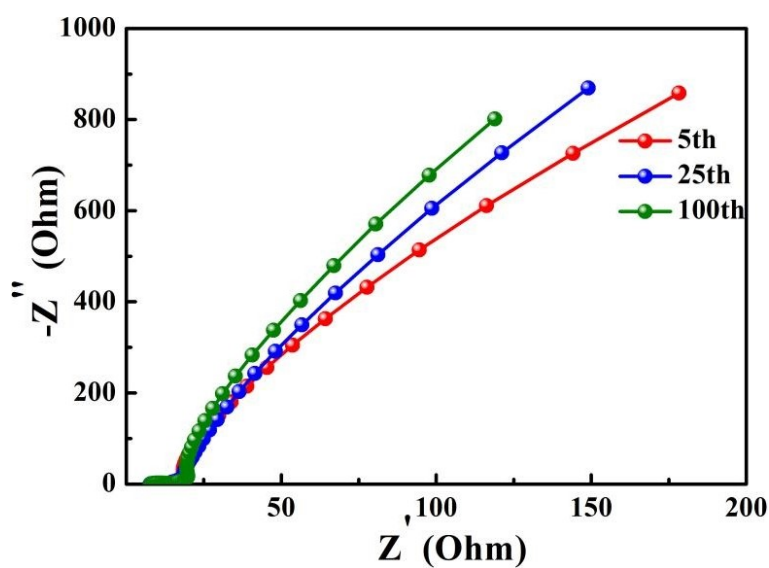

Fig. S17 Nyquist plots of the CuS@CuSe electrode at the 5th, 25th, and 50th cycle.

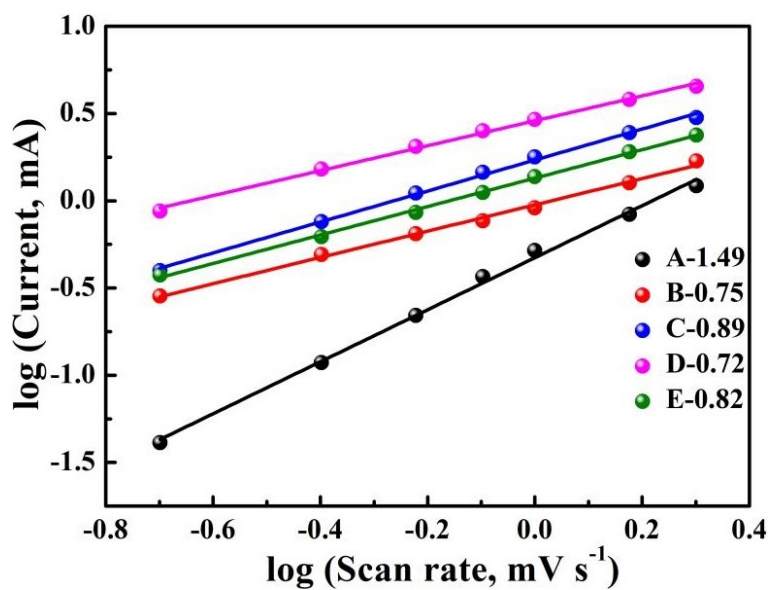

Fig. S18 The logarithmic linear plots between  $\log v$  and  $\log i$  at five specific redox peaks for the CuS@CuSe electrode.



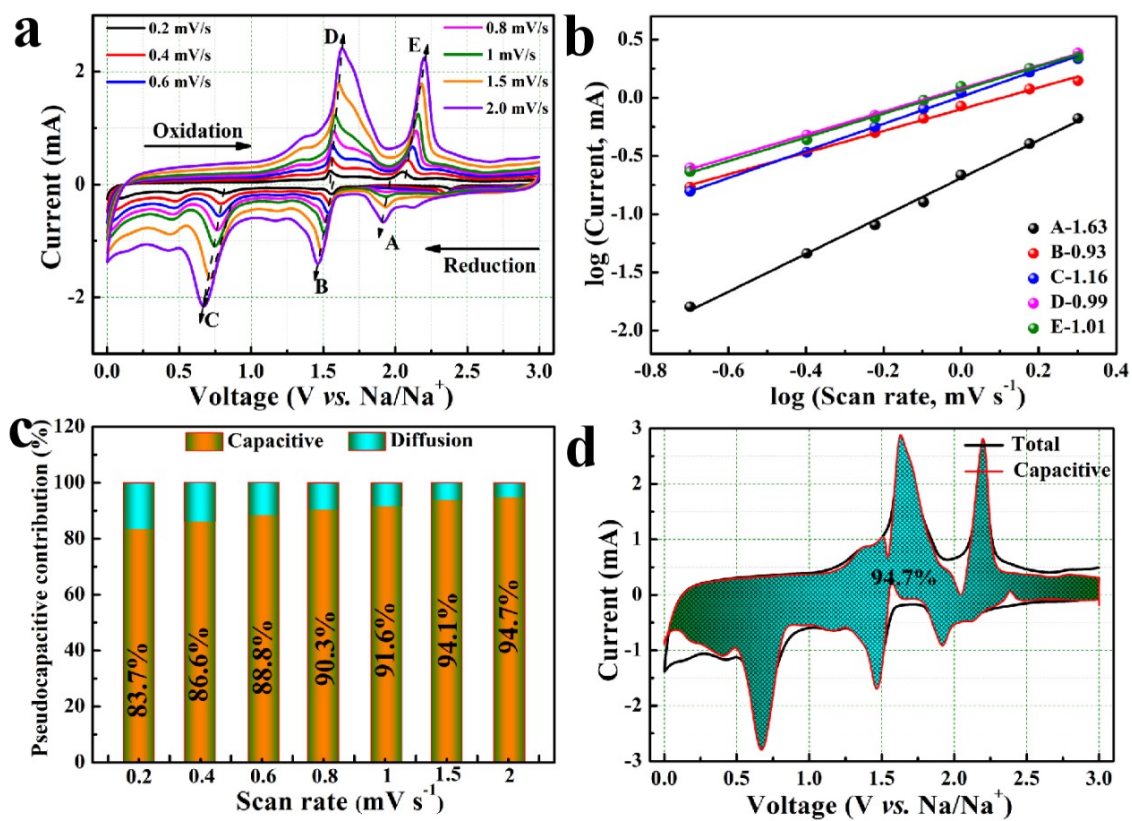

Fig. S19 CV curves (a) of the CuS electrode at diverse scan rates, and the corresponding logarithmic linear plots between  $\log v$  and  $\log i$  at five specific redox peaks (b). (c) Capacitive contribution of the CuS electrode conducted at  $2.0 \text{ mV s}^{-1}$ . (d) The normalized contribution proportion of the capacitive for the CuS electrode at each scan rate.

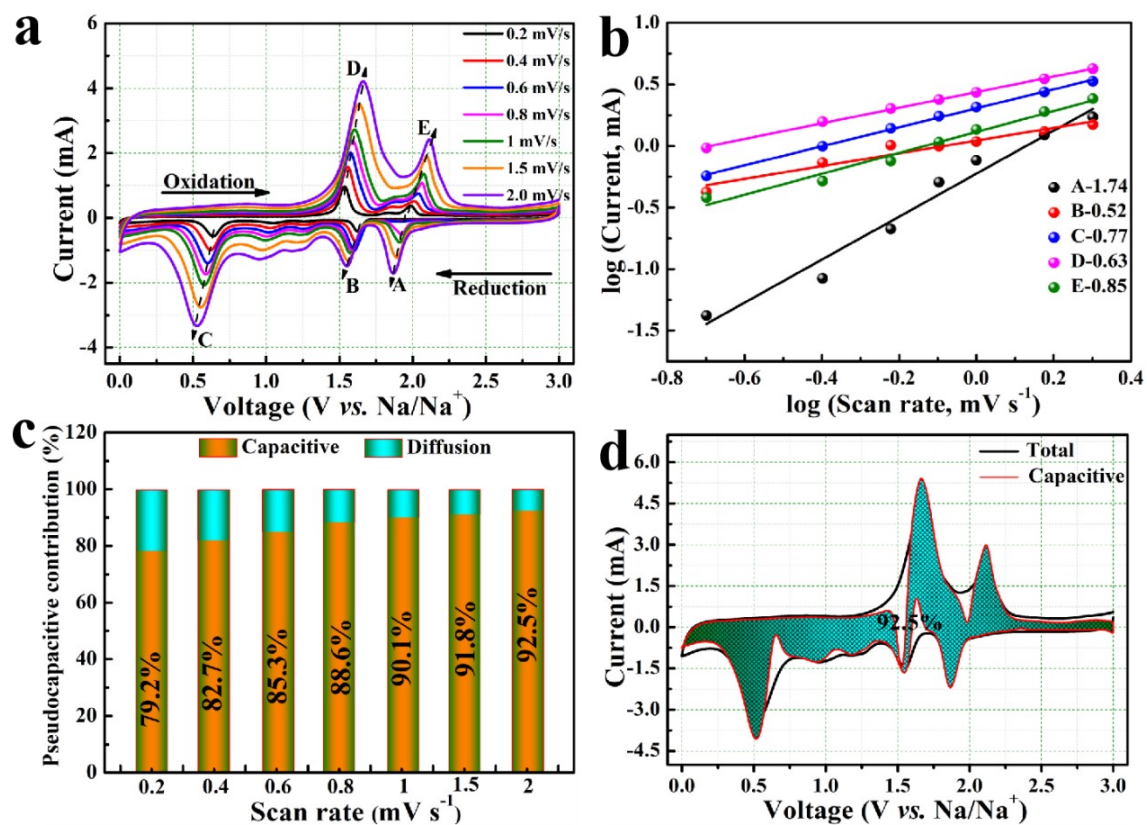

Fig. S20 CV curves (a) of the CuSe electrode at diverse scan rates, and the corresponding logarithmic linear plots between  $\log v$  and  $\log i$  at five specific redox peaks (b). (c) Capacitive contribution of the CuSe electrode conducted at  $2.0 \text{ mV s}^{-1}$ . (d) The normalized contribution proportion of the capacitive for the CuSe electrode at each scan rate.

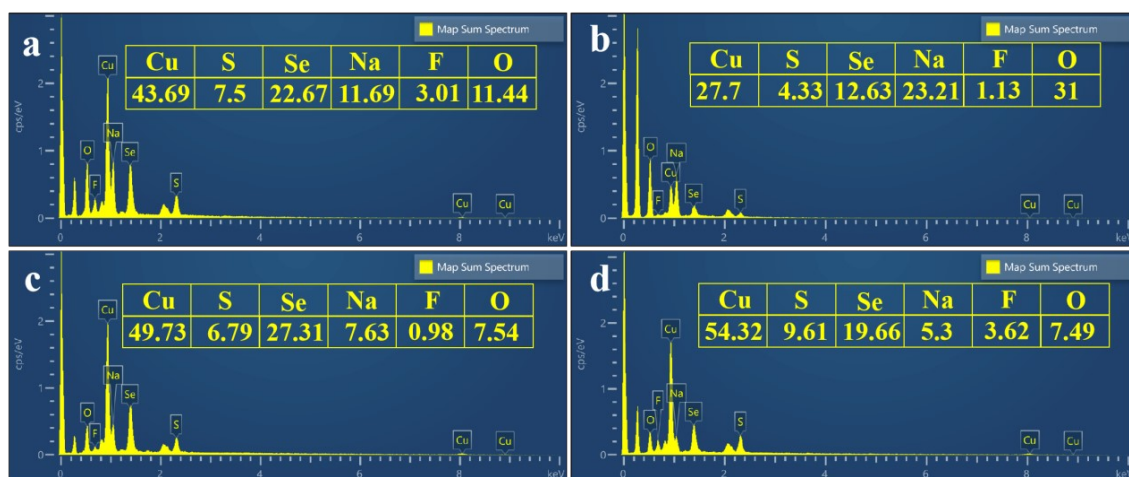

Fig. S21 Ex-situ EDX spectra at different discharged/charged states for the CuS@CuSe electrode: (a) Discharged to 1.5 V, (b) Discharged to 0.01 V, (c) Charged to 1.56 V, (d) Charged to 3.0 V.

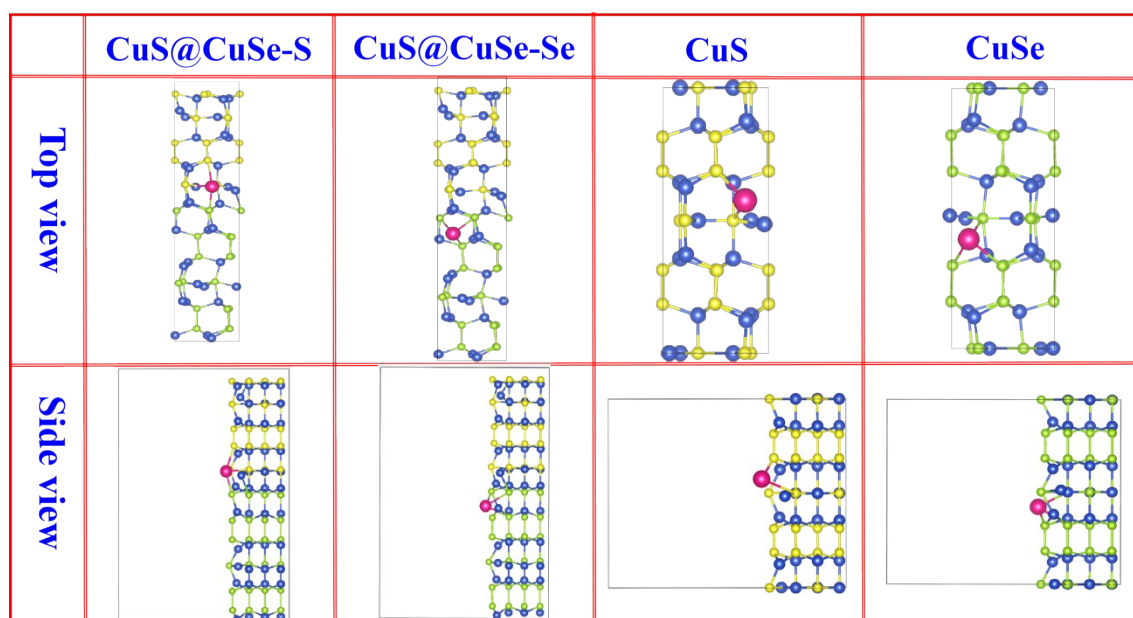

Fig. S22 Schematic illustration of Na<sup>+</sup> adsorbed onto CuS@CuSe, CuS, and CuSe with the top view and side view. In which CuS@CuSe-S and CuS@CuSe-Se represent Na<sup>+</sup> adsorbed on the CuS/CuSe interface close to CuS or CuSe side, respectively.

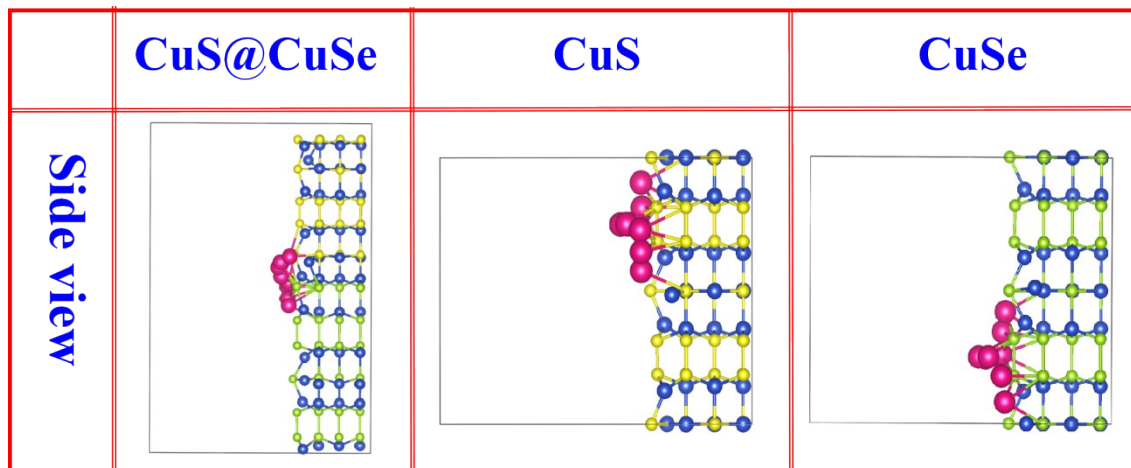

Fig. S23 Ionic migration path in CuS@CuSe, CuS, and CuSe with the side view.

Table S1 ICP analysis of the CuS@CuSe composites.

| Samples  | S (Wt %) | Se (Wt %) | Mass ratio | Molar ratio |
|----------|----------|-----------|------------|-------------|
| CuS@CuSe | 7.22     | 68.71     | 0.28 : 1   | 0.42 : 1    |



Table S2 Comparison of cycle lifespan and specific capacity of the CuS@CuSe anode with previous reported CuS-/CuSe-based anodes in SIBs systems.

| Materials                                           | Voltage window<br>(V) | Rate<br>(A g <sup>-1</sup> ) | Cycle<br>number | Capacity<br>(mAh g <sup>-1</sup> ) | Ref.             |
|-----------------------------------------------------|-----------------------|------------------------------|-----------------|------------------------------------|------------------|
| Nanosheets-assembled<br>CuSe                        | 0.4-3.0               | 5.0                          | 1200            | 290.0                              | 1                |
| Micro-sized Cu <sub>2</sub> Se                      | 0.3-2.2               | 1.0                          | 1000            | 256.0                              | 2                |
| Cu <sub>2</sub> Se nanosheet array                  | 0.4-3.0               | 20.0                         | 6500            | 220.0                              | 3                |
| Cu <sub>2</sub> Se-ZnSe<br>heterojunction           | 0.01-3.0              | 0.5                          | 500             | 205.0                              | 4                |
| Mesoporous Cu <sub>2-x</sub> Se<br>nanocrystals     | 0.3-2.5               | 5.0                          | 3000            | 212.4                              | 5                |
| Cu <sub>2</sub> Se@N-C                              | 0.01-3.0              | 2.0                          | 2000            | 101.0                              | 6                |
| Bulk Cu <sub>2-x</sub> Se plates                    | 0.4-3.0               | 5.0                          | 1000            | 316.1                              | 7                |
| Cu <sub>2-x</sub> Se nanorods                       | 1.0-3.0               | 0.1                          | 400             | 149.3                              | 8                |
| CuS microspheres                                    | 0.4-3.0               | 10                           | 1000            | 312.5                              | 9                |
| CuS microspheres                                    | 0.6-3.0               | 0.5                          | 500             | 403.0                              | 10               |
| CuS@CoS <sub>2</sub><br>double-shelled<br>nanoboxes | 0.4-2.6               | 0.5                          | 500             | 403.0                              | 11               |
| N-doped CuS@C<br>nanowires                          | 0.4-3.0               | 2.0                          | 10000           | 216.7                              | 12               |
| Platelet-like CuS                                   | 0.4-2.6               | 2.0                          | 500             | 320                                | 13               |
| ZnS/CuS@C                                           | 0.4-3.0               | 10.0                         | 1750            | 282.7                              | 14               |
| Hydrangea-like CuS                                  | 0.4-2.6               | 1.0                          | 400             | 335                                | 15               |
| Pine-needle-like CuS                                | 0.3-3.0               | 5.0                          | 1000            | 436.0                              | 16               |
| CuS@N-C                                             | 0.4-3.0               | 5.0                          | 1200            | 300.2                              | 17               |
| <b>CuS@CuSe</b>                                     | <b>0.01-3.0</b>       | <b>20.0</b>                  | <b>1500</b>     | <b>303.1</b>                       | <b>This work</b> |

## References

- 1 H. Z. Lin, M. L. Li, X. Yang, D. X. Yu, Y. Zeng, C. Z. Wang, G. Chen and F. Du, *Adv. Energy Mater.*, 2019, **9**, 1900323.
- 2 L. Y. Shao, S. G. Wang, J. P. Qi, Z. P. Sun, X. Y. Shi, Y. S. Shi and X. Lu, *Mater. Today Phys.*, 2021, **19**, 100422.
- 3 Y. H. Xiao, X. B. Zhao, X. Z. Wang, D. C. Su, S. Bai, W. Chen, S. M. Fang, L. M. Zhou, H. M. Cheng and F. Li, *Adv. Energy Mater.*, 2020, **10**, 2070113.
- 4 Q. Gao, P. C. Li, S. S. Ding, H. C. He, M. Q. Cai, X. T. Ning, Y. Cai and M. Zhang, *Ionics*, 2020, **26**, 5525–5533.
- 5 Y. J. Li, X. C. Sun, Z. J. Cheng, X. Xu, J. Pan, X. F. Yang, F. Tian, Y. L. Li, J. Yang and Y. T. Qian, *Energy Storage Mater.*, 2019, **22**, 275–283.
- 6 L. Hu, C. Q. Shang, E. M. Akinoglu, X. Wang and G. F. Zhou, *Nanomaterials*, 2020, **10**, 302.
- 7 Y. H. Xiao, K. Y. Zhang, X. B. Zhao, D. C. Su, L. M. Zhou, S. D. Wu, X. Z. Wang, H. Z. Guo and S. M. Fang, *J. Alloy. Compd.*, 2021, **879**, 160485.
- 8 H. Li, J. L. Jiang, J. X. Huang, Y. H. Wang, Y. Y. Peng, Y. Y. Zhang, B. J. Hwang and J. B. Zhao, *ACS Appl. Mater. Interfaces*, 2018, **10**, 13491–13498.
- 9 Y. H. Xiao, D. C. Su, X. Z. Wang, S. D. Wu, L. M. Zhou, Y. Shi, S. M. Fang, H. M. Cheng and F. Li, *Adv. Energy Mater.*, 2018, **8**, 1800930.
- 10 H. Li, Y. H. Wang, J. L. Jiang, Y. Y. Zhang, Y. Y. Peng and J. B. Zhao, *Electrochim. Acta*, 2017, **247**, 851–859.
- 11 Y. J. Fang, B. Y. Guan, D. Y. Luan and X. W. Lou, *Angew. Chem., Int. Ed.*, 2019, **58**, 7739–7748.
- 12 D. Zhao, M. M. Yin, C. H. Feng, K. Zhan, Q. Z. Jiao, H. S. Li and Y. Zhao, *ACS Sustainable Chem. Eng.*, 2020, **8**, 11317–11327.
- 13 Z. G. Yang, Z. G. Wu, J. Liu, Y. X. Liu, S. Y. Gao, J. A. Wang, Y. Xiao, Y. J. Zhong, B. H. Zhong and X. D. Guo, *J. Mater. Chem. A*, 2020, **8**, 8049–8057.
- 14 W. X. Zhao, L. X. Gao, L. C. Yue, X. Y. Wang, Q. Liu, Y. L. Luo, T. S. Li, X. F. Shi, A. M. Asiri and X. P. Sun, *J. Mater. Chem. A*, 2021, **9**, 6402–6412.
- 15 Z. G. Yang, Z. G. Wu, W. B. Hua, Y. Xiao, G. K. Wang, Y. X. Liu, C. J. Wu, Y. C. Li, B. H. Zhong, W. Xiang, Y. J. Zhong and X. D. Guo, *Adv. Sci.*, 2020, **7**, 1903279.
- 16 D. X. Yu, M. L. Li, T. Yu, C. Z. Wang, Y. Zeng, X. D. Hu, G. Chen, G. C. Yang and F. Du, *J. Mater. Chem. A*, 2019, **7**, 10619–10628.
- 17 X. Q. Liu, X. Y. Li, X. L. Lu, X. He, N. Jiang, Y. Huo, C. G. Xu and D. M. Lin, *J. Alloy. Compd.*, 2021, **854**, 157132.
